# Supplementary material for: A Unified Formulation of k-Means, Fuzzy c-Means and Gaussian Mixture Model by the Kolmogorov–Nagumo Average
Source: MDPI journal article supplement (doi:10.3390/e23050518), 2021-04-24
Supplement: s1 [file s1]

# Supporting information for “A unified formulation of k-means, fuzzy c-means and Gaussian mixture model by Kolmogorov-Nagumo average”

Osamu Komori

Seikei University

Kichijoji Kitamachi, Musashino, Tokyo 180-8633, Japan

Shinto Eguchi

The Institute of Statistical Mathematics

Midori-cho 10-3, Tachikawa Tokyo 190-8562, Japan

## A Notations of methods and characteristics of benchmark datasets

Table S 1: Summary of clustering methods

| $\tau \backslash \beta$ | 0                 | 0.5                 | 1                 |
|-------------------------|-------------------|---------------------|-------------------|
| 0.5                     | Gaussian          | GP                  | Pareto            |
| 1                       | Gk <sub>1</sub>   | GPkf <sub>1</sub>   | Pf <sub>1</sub>   |
| 10                      | Gk <sub>10</sub>  | GPkf <sub>10</sub>  | Pf <sub>10</sub>  |
| 100                     | Gk <sub>100</sub> | GPkf <sub>100</sub> | Pf <sub>100</sub> |
| $\infty$                | k-means           | kf                  | fuzzy c-means     |

Table S 2: Sample sizes, the number of clusters and dimensions of benchmark datasets

| Dataset             | Flame | Compound | D31  | Aggregation | Glass | Jain | Pathbased | Spiral | R15 | Dim1024 | A3   | Unbalance | S1,S2,S3 <sup>a</sup> | Birch1,Birch2 <sup>a</sup> |
|---------------------|-------|----------|------|-------------|-------|------|-----------|--------|-----|---------|------|-----------|-----------------------|----------------------------|
| Sample size ( $n$ ) | 240   | 399      | 3100 | 788         | 214   | 373  | 300       | 312    | 600 | 1024    | 7500 | 6500      | 5000                  | 1000                       |
| Clusters ( $K$ )    | 2     | 6        | 31   | 7           | 7     | 2    | 3         | 3      | 15  | 16      | 50   | 8         | 15                    | 100                        |
| Dimension ( $d$ )   | 2     | 2        | 2    | 2           | 9     | 2    | 2         | 2      | 2   | 1024    | 2    | 2         | 2                     | 2                          |

<sup>a</sup> S1, S2 and S3 have Gaussian clusters with different degrees of cluster overlap. Birch1 has clusters in a regular grid structure; Birch2 has clusters at a sine curve. Birch1 and Birch2 are subsampled to have small sample sizes.

- See <http://cs.uef.fi/sipu/datasets/> for more details.

## B Results of benchmark data with $\Sigma_k \neq I$ in Pareto clustering

Table S 3: The result of Purity ( $\Sigma_k \neq I$ )

| Data         | k-means      | fuzzy-c      | GP           | Pareto       | Gk <sub>1</sub> | GPkf <sub>1</sub> | Pf <sub>1</sub> | Gk <sub>10</sub> | GPkf <sub>10</sub> | Pf <sub>10</sub> | Gk <sub>100</sub> | GPkf <sub>100</sub> | Pf <sub>100</sub> | PAM          | Gaussian     |
|--------------|--------------|--------------|--------------|--------------|-----------------|-------------------|-----------------|------------------|--------------------|------------------|-------------------|---------------------|-------------------|--------------|--------------|
| Flame        | 0.829        | <b>0.854</b> | 0.796        | 0.808        | 0.771           | 0.796             | 0.808           | 0.771            | 0.796              | 0.808            | 0.771             | 0.796               | 0.808             | 0.85         | 0.746        |
| Compound     | 0.789        | 0.789        | 0.782        | 0.767        | 0.802           | 0.782             | 0.767           | 0.802            | 0.784              | 0.767            | 0.802             | 0.784               | 0.769             | 0.737        | <b>0.845</b> |
| D31          | 0.756        | 0.822        | 0.974        | 0.974        | 0.973           | 0.974             | 0.974           | 0.973            | 0.974              | 0.974            | 0.973             | 0.974               | 0.974             | <b>0.977</b> | 0.875        |
| Aaggregation | 0.939        | 0.871        | 0.949        | 0.952        | 0.948           | 0.949             | 0.952           | 0.948            | 0.949              | 0.951            | 0.948             | 0.949               | 0.951             | 0.945        | <b>0.956</b> |
| Glass        | <b>0.472</b> | 0.439        | 0.407        | 0.355        | 0.411           | 0.374             | 0.355           | 0.407            | 0.374              | 0.355            | 0.397             | 0.379               | 0.355             | 0.449        | 0.383        |
| Jain         | <b>0.874</b> | 0.869        | 0.786        | 0.815        | 0.759           | 0.786             | 0.812           | 0.759            | 0.783              | 0.81             | 0.759             | 0.783               | 0.81              | 0.855        | 0.74         |
| Pathbased    | 0.76         | <b>0.763</b> | 0.743        | 0.753        | 0.74            | 0.743             | 0.753           | 0.74             | 0.743              | 0.753            | 0.74              | 0.743               | 0.753             | 0.757        | 0.707        |
| Spiral       | 0.343        | 0.34         | 0.346        | 0.349        | 0.34            | 0.349             | 0.346           | 0.34             | 0.353              | 0.346            | 0.34              | 0.353               | 0.346             | <b>0.369</b> | 0.349        |
| R15          | <b>0.997</b> | <b>0.997</b> | <b>0.997</b> | <b>0.997</b> | <b>0.997</b>    | <b>0.997</b>      | <b>0.997</b>    | <b>0.997</b>     | <b>0.997</b>       | <b>0.997</b>     | 0.993             | <b>0.997</b>        | <b>0.997</b>      | <b>0.997</b> | <b>0.997</b> |
| Dim1024      | 0.75         | <b>1</b>     | <b>1</b>     | <b>1</b>     | <b>1</b>        | <b>1</b>          | <b>1</b>        | <b>1</b>         | <b>1</b>           | <b>1</b>         | <b>1</b>          | <b>1</b>            | <b>1</b>          | <b>1</b>     | 0.806        |
| a3           | 0.872        | 0.853        | 0.995        | 0.997        | 0.994           | 0.995             | 0.997           | 0.994            | 0.995              | 0.997            | 0.994             | 0.995               | 0.997             | <b>0.998</b> | 0.586        |
| Unba         | <b>0.969</b> | 0.954        | <b>0.969</b> | <b>0.969</b> | <b>0.969</b>    | <b>0.969</b>      | <b>0.969</b>    | <b>0.969</b>     | <b>0.969</b>       | <b>0.969</b>     | <b>0.969</b>      | <b>0.969</b>        | <b>0.969</b>      | <b>0.969</b> | 0.954        |
| S1           | 0.929        | 0.93         | <b>0.995</b> | 0.994        | <b>0.995</b>    | <b>0.995</b>      | 0.994           | <b>0.995</b>     | <b>0.995</b>       | 0.994            | <b>0.995</b>      | <b>0.995</b>        | 0.994             | 0.993        | <b>0.995</b> |
| S2           | 0.838        | 0.907        | <b>0.972</b> | 0.969        | 0.97            | <b>0.972</b>      | 0.969           | 0.97             | <b>0.972</b>       | 0.969            | 0.97              | <b>0.972</b>        | 0.969             | 0.97         | 0.967        |
| S3           | 0.754        | 0.803        | <b>0.865</b> | 0.858        | 0.857           | <b>0.865</b>      | 0.858           | 0.857            | <b>0.865</b>       | 0.858            | 0.857             | <b>0.865</b>        | 0.858             | 0.859        | 0.841        |
| Birch1       | 0.84         | 0.813        | 0.894        | 0.902        | 0.891           | 0.894             | 0.903           | 0.89             | 0.891              | 0.904            | 0.89              | 0.891               | 0.904             | <b>0.925</b> | 0.643        |
| Birch2       | 0.755        | 0.736        | 0.869        | <b>0.875</b> | 0.867           | 0.869             | 0.874           | 0.865            | 0.867              | 0.874            | 0.865             | 0.867               | 0.874             | 0.855        | 0.588        |

Table S 4: The result of F values ( $\Sigma_k \neq I$ )

| Data        | k-means      | fuzzy-c      | GP           | Pareto       | Gk <sub>1</sub> | GPkf <sub>1</sub> | Pf <sub>1</sub> | Gk <sub>10</sub> | GPkf <sub>10</sub> | Pf <sub>10</sub> | Gk <sub>100</sub> | GPkf <sub>100</sub> | Pf <sub>100</sub> | PAM          | Gaussian     |
|-------------|--------------|--------------|--------------|--------------|-----------------|-------------------|-----------------|------------------|--------------------|------------------|-------------------|---------------------|-------------------|--------------|--------------|
| Flame       | 0.832        | <b>0.857</b> | 0.799        | 0.812        | 0.774           | 0.799             | 0.812           | 0.774            | 0.799              | 0.812            | 0.774             | 0.799               | 0.812             | 0.853        | 0.748        |
| Compound    | 0.622        | 0.63         | 0.614        | 0.606        | 0.644           | 0.615             | 0.606           | 0.634            | 0.616              | 0.606            | 0.634             | 0.616               | 0.609             | 0.601        | <b>0.719</b> |
| D31         | 0.758        | 0.789        | 0.974        | 0.974        | 0.973           | 0.974             | 0.974           | 0.973            | 0.974              | 0.974            | 0.973             | 0.974               | 0.974             | <b>0.977</b> | 0.877        |
| Aggregation | 0.852        | 0.755        | 0.863        | 0.857        | 0.867           | 0.864             | 0.856           | 0.868            | 0.864              | 0.855            | 0.868             | 0.864               | 0.855             | 0.848        | <b>0.876</b> |
| Glass       | <b>0.433</b> | 0.337        | 0.363        | 0.375        | 0.404           | 0.35              | 0.375           | 0.398            | 0.35               | 0.375            | 0.388             | 0.35                | 0.375             | 0.375        | 0.377        |
| Jain        | <b>0.88</b>  | 0.875        | 0.799        | 0.826        | 0.773           | 0.799             | 0.824           | 0.773            | 0.796              | 0.821            | 0.773             | 0.796               | 0.821             | 0.863        | 0.587        |
| Pathbased   | 0.721        | <b>0.726</b> | 0.696        | 0.711        | 0.691           | 0.696             | 0.711           | 0.691            | 0.696              | 0.711            | 0.691             | 0.696               | 0.711             | 0.716        | 0.655        |
| Spiral      | 0.352        | 0.345        | 0.346        | 0.346        | 0.343           | 0.348             | 0.343           | 0.345            | 0.349              | 0.343            | 0.345             | 0.349               | 0.343             | <b>0.377</b> | 0.347        |
| R15         | <b>0.997</b> | <b>0.997</b> | <b>0.997</b> | <b>0.997</b> | <b>0.997</b>    | <b>0.997</b>      | <b>0.997</b>    | <b>0.997</b>     | <b>0.997</b>       | <b>0.997</b>     | 0.993             | <b>0.997</b>        | <b>0.997</b>      | <b>0.997</b> | <b>0.997</b> |
| Dim1024     | 0.831        | <b>1</b>     | <b>1</b>     | <b>1</b>     | <b>1</b>        | <b>1</b>          | <b>1</b>        | <b>1</b>         | <b>1</b>           | <b>1</b>         | <b>1</b>          | <b>1</b>            | <b>1</b>          | <b>1</b>     | 0.853        |
| A3          | 0.86         | 0.824        | 0.995        | 0.997        | 0.994           | 0.995             | 0.997           | 0.994            | 0.995              | 0.997            | 0.994             | 0.995               | 0.997             | <b>0.998</b> | 0.689        |
| Unba        | 0.867        | 0.749        | 0.778        | 0.776        | 0.78            | 0.779             | 0.776           | 0.78             | 0.778              | 0.776            | 0.78              | 0.778               | 0.776             | 0.78         | <b>0.941</b> |
| S1          | 0.944        | 0.928        | <b>0.995</b> | 0.994        | <b>0.995</b>    | <b>0.995</b>      | 0.994           | <b>0.995</b>     | <b>0.995</b>       | 0.994            | <b>0.995</b>      | <b>0.995</b>        | 0.994             | 0.993        | <b>0.995</b> |
| S2          | 0.832        | 0.906        | <b>0.972</b> | 0.969        | 0.97            | <b>0.972</b>      | 0.969           | 0.97             | <b>0.972</b>       | 0.969            | 0.97              | <b>0.972</b>        | 0.969             | 0.97         | 0.966        |
| S3          | 0.758        | 0.801        | <b>0.864</b> | 0.857        | 0.856           | <b>0.864</b>      | 0.857           | 0.856            | <b>0.864</b>       | 0.857            | 0.856             | <b>0.864</b>        | 0.857             | 0.858        | 0.843        |
| Birch1      | 0.826        | 0.783        | 0.885        | 0.891        | 0.88            | 0.885             | 0.892           | 0.879            | 0.882              | 0.893            | 0.879             | 0.882               | 0.893             | <b>0.912</b> | 0.666        |
| Birch2      | 0.724        | 0.715        | 0.86         | <b>0.863</b> | 0.857           | 0.86              | 0.862           | 0.855            | 0.858              | 0.862            | 0.855             | 0.858               | 0.862             | 0.832        | 0.645        |

Table S 5: The result of Centroid index ( $\Sigma_k \neq I$ )

| Data        | k-means  | fuzzy-c  | GP       | Pareto   | Gk <sub>1</sub> | GPkf <sub>1</sub> | Pf <sub>1</sub> | Gk <sub>10</sub> | GPkf <sub>10</sub> | Pf <sub>10</sub> | Gk <sub>100</sub> | GPkf <sub>100</sub> | Pf <sub>100</sub> | PAM      | Gaussian |
|-------------|----------|----------|----------|----------|-----------------|-------------------|-----------------|------------------|--------------------|------------------|-------------------|---------------------|-------------------|----------|----------|
| Flame       | <b>0</b> | <b>0</b> | <b>0</b> | <b>0</b> | <b>0</b>        | <b>0</b>          | <b>0</b>        | <b>0</b>         | <b>0</b>           | <b>0</b>         | <b>0</b>          | <b>0</b>            | <b>0</b>          | <b>0</b> | <b>0</b> |
| Compound    | <b>2</b> | 3        | <b>2</b> | <b>2</b> | <b>2</b>        | <b>2</b>          | <b>2</b>        | <b>2</b>         | <b>2</b>           | <b>2</b>         | <b>2</b>          | <b>2</b>            | <b>2</b>          | <b>2</b> | <b>2</b> |
| D31         | 7        | 5        | <b>0</b> | <b>0</b> | <b>0</b>        | <b>0</b>          | <b>0</b>        | <b>0</b>         | <b>0</b>           | <b>0</b>         | <b>0</b>          | <b>0</b>            | <b>0</b>          | <b>0</b> | 3        |
| Aggregation | <b>1</b> | 2        | <b>1</b> | <b>1</b> | <b>1</b>        | <b>1</b>          | <b>1</b>        | <b>1</b>         | <b>1</b>           | <b>1</b>         | <b>1</b>          | <b>1</b>            | <b>1</b>          | <b>1</b> | <b>1</b> |
| Glass       | 3        | 3        | 3        | 3        | 3               | 3                 | 3               | 2                | 3                  | 3                | 2                 | 3                   | 3                 | 4        | <b>1</b> |
| Jain        | <b>0</b> | <b>0</b> | <b>0</b> | <b>0</b> | <b>0</b>        | <b>0</b>          | <b>0</b>        | <b>0</b>         | <b>0</b>           | <b>0</b>         | <b>0</b>          | <b>0</b>            | <b>0</b>          | <b>0</b> | 1        |
| Pathbased   | <b>1</b> | <b>1</b> | <b>1</b> | <b>1</b> | <b>1</b>        | <b>1</b>          | <b>1</b>        | <b>1</b>         | <b>1</b>           | <b>1</b>         | <b>1</b>          | <b>1</b>            | <b>1</b>          | <b>1</b> | <b>1</b> |
| Spiral      | 1        | 1        | <b>0</b> | <b>0</b> | <b>0</b>        | <b>0</b>          | <b>0</b>        | <b>0</b>         | <b>0</b>           | <b>0</b>         | <b>0</b>          | <b>0</b>            | <b>0</b>          | 1        | <b>0</b> |
| R15         | <b>0</b> | <b>0</b> | <b>0</b> | <b>0</b> | <b>0</b>        | <b>0</b>          | <b>0</b>        | <b>0</b>         | <b>0</b>           | <b>0</b>         | <b>0</b>          | <b>0</b>            | <b>0</b>          | <b>0</b> | <b>0</b> |
| Dim1024     | 4        | <b>0</b> | <b>0</b> | <b>0</b> | <b>0</b>        | <b>0</b>          | <b>0</b>        | <b>0</b>         | <b>0</b>           | <b>0</b>         | <b>0</b>          | <b>0</b>            | <b>0</b>          | <b>0</b> | <b>0</b> |
| A3          | 6        | 7        | <b>0</b> | <b>0</b> | <b>0</b>        | <b>0</b>          | <b>0</b>        | <b>0</b>         | <b>0</b>           | <b>0</b>         | <b>0</b>          | <b>0</b>            | <b>0</b>          | <b>0</b> | 18       |
| Unba        | <b>2</b> | 3        | <b>2</b> | <b>2</b> | <b>2</b>        | <b>2</b>          | <b>2</b>        | <b>2</b>         | <b>2</b>           | <b>2</b>         | <b>2</b>          | <b>2</b>            | <b>2</b>          | <b>2</b> | 3        |
| S1          | 1        | 1        | <b>0</b> | <b>0</b> | <b>0</b>        | <b>0</b>          | <b>0</b>        | <b>0</b>         | <b>0</b>           | <b>0</b>         | <b>0</b>          | <b>0</b>            | <b>0</b>          | <b>0</b> | <b>0</b> |
| S2          | 2        | 1        | <b>0</b> | <b>0</b> | <b>0</b>        | <b>0</b>          | <b>0</b>        | <b>0</b>         | <b>0</b>           | <b>0</b>         | <b>0</b>          | <b>0</b>            | <b>0</b>          | <b>0</b> | <b>0</b> |
| S3          | 2        | 1        | <b>0</b> | <b>0</b> | <b>0</b>        | <b>0</b>          | <b>0</b>        | <b>0</b>         | <b>0</b>           | <b>0</b>         | <b>0</b>          | <b>0</b>            | <b>0</b>          | <b>0</b> | <b>0</b> |
| Birch1      | 12       | 18       | <b>4</b> | <b>4</b> | <b>4</b>        | 5                 | <b>4</b>        | <b>4</b>         | 5                  | <b>4</b>         | <b>4</b>          | 5                   | <b>4</b>          | <b>4</b> | 34       |
| Birch2      | 23       | 25       | <b>8</b> | 9        | <b>8</b>        | <b>8</b>          | 9               | <b>8</b>         | 9                  | 9                | <b>8</b>          | 9                   | 9                 | 9        | 49       |

# C Results of benchmark data with $\Sigma_k = I$ in Pareto clustering

Table S 6: The result of Purity ( $\Sigma_k = I$ )

| data        | k-means      | fuzzy-c      | GP           | Pareto       | Gk <sub>1</sub> | GPkf <sub>1</sub> | Pf <sub>1</sub> | Gk <sub>10</sub> | GPkf <sub>10</sub> | Pf <sub>10</sub> | Gk <sub>100</sub> | GPkf <sub>100</sub> | Pf <sub>100</sub> | PAM          | Gaussian     |
|-------------|--------------|--------------|--------------|--------------|-----------------|-------------------|-----------------|------------------|--------------------|------------------|-------------------|---------------------|-------------------|--------------|--------------|
| Flame       | 0.829        | <b>0.854</b> | 0.637        | 0.637        | 0.771           | 0.779             | 0.762           | 0.758            | 0.771              | 0.783            | 0.758             | 0.771               | 0.783             | 0.85         | 0.746        |
| Compound    | 0.789        | 0.789        | 0.729        | 0.737        | 0.802           | 0.762             | 0.739           | 0.797            | 0.787              | 0.757            | 0.797             | 0.784               | 0.764             | 0.737        | <b>0.845</b> |
| D31         | 0.756        | 0.822        | 0.286        | 0.356        | 0.498           | 0.609             | 0.567           | 0.965            | 0.967              | 0.963            | 0.972             | 0.973               | 0.973             | <b>0.977</b> | 0.875        |
| Aggregation | 0.939        | 0.871        | 0.954        | 0.952        | 0.954           | <b>0.956</b>      | 0.952           | 0.954            | <b>0.956</b>       | 0.953            | 0.954             | <b>0.956</b>        | 0.953             | 0.945        | <b>0.956</b> |
| Glass       | <b>0.472</b> | 0.439        | 0.388        | 0.355        | 0.444           | 0.355             | 0.355           | 0.411            | 0.36               | 0.355            | 0.416             | 0.36                | 0.355             | 0.449        | 0.383        |
| Jain        | <b>0.874</b> | 0.869        | 0.861        | <b>0.874</b> | 0.855           | 0.858             | 0.861           | 0.842            | 0.855              | 0.861            | 0.842             | 0.855               | 0.861             | 0.855        | 0.74         |
| Pathbased   | 0.76         | <b>0.763</b> | 0.657        | 0.633        | 0.737           | 0.64              | 0.633           | 0.747            | 0.74               | 0.727            | 0.747             | 0.74                | 0.73              | 0.757        | 0.707        |
| Spiral      | 0.343        | 0.34         | <b>0.513</b> | 0.423        | 0.372           | 0.369             | 0.375           | 0.362            | 0.356              | 0.356            | 0.362             | 0.356               | 0.356             | 0.369        | 0.349        |
| R15         | <b>0.997</b> | <b>0.997</b> | 0.58         | 0.55         | 0.755           | 0.795             | 0.74            | 0.992            | 0.992              | 0.992            | 0.993             | 0.993               | <b>0.997</b>      | <b>0.997</b> | <b>0.997</b> |
| Dim1024     | 0.75         | <b>1</b>     | <b>1</b>     | <b>1</b>     | <b>1</b>        | <b>1</b>          | <b>1</b>        | <b>1</b>         | <b>1</b>           | <b>1</b>         | <b>1</b>          | <b>1</b>            | <b>1</b>          | <b>1</b>     | 0.806        |
| A3          | 0.872        | 0.853        | 0.301        | 0.274        | 0.492           | 0.587             | 0.554           | 0.928            | 0.962              | 0.95             | 0.99              | 0.992               | 0.992             | <b>0.998</b> | 0.586        |
| Unba        | <b>0.969</b> | 0.954        | 0.338        | 0.338        | 0.67            | 0.858             | 0.808           | <b>0.969</b>     | <b>0.969</b>       | <b>0.969</b>     | <b>0.969</b>      | <b>0.969</b>        | <b>0.969</b>      | <b>0.969</b> | 0.954        |
| S1          | 0.929        | 0.93         | 0.61         | 0.509        | 0.713           | 0.772             | 0.655           | 0.993            | 0.994              | 0.994            | 0.993             | 0.994               | <b>0.995</b>      | 0.993        | <b>0.995</b> |
| S2          | 0.838        | 0.907        | 0.517        | 0.422        | 0.568           | 0.746             | 0.651           | 0.966            | 0.969              | 0.964            | 0.966             | <b>0.97</b>         | 0.965             | <b>0.97</b>  | 0.967        |
| S3          | 0.754        | 0.803        | 0.507        | 0.469        | 0.608           | 0.596             | 0.538           | 0.848            | 0.849              | 0.844            | 0.848             | 0.85                | 0.845             | <b>0.859</b> | 0.841        |
| Birch1      | 0.84         | 0.813        | 0.324        | 0.288        | 0.407           | 0.437             | 0.438           | 0.694            | 0.711              | 0.691            | 0.885             | 0.892               | 0.891             | <b>0.925</b> | 0.643        |
| Birch2      | 0.755        | 0.736        | 0.277        | 0.278        | 0.269           | 0.359             | 0.415           | 0.393            | 0.495              | 0.512            | 0.749             | 0.758               | 0.752             | <b>0.855</b> | 0.588        |

Table S 7: The result of F values ( $\Sigma_k = I$ )

| data        | k-means      | fuzzy-c      | GP           | Pareto      | Gk <sub>1</sub> | GPkf <sub>1</sub> | Pf <sub>1</sub> | Gk <sub>10</sub> | GPkf <sub>10</sub> | Pf <sub>10</sub> | Gk <sub>100</sub> | GPkf <sub>100</sub> | Pf <sub>100</sub> | PAM          | Gaussian     |
|-------------|--------------|--------------|--------------|-------------|-----------------|-------------------|-----------------|------------------|--------------------|------------------|-------------------|---------------------|-------------------|--------------|--------------|
| Flame       | 0.832        | <b>0.857</b> | 0.644        | 0.638       | 0.774           | 0.783             | 0.766           | 0.761            | 0.774              | 0.787            | 0.761             | 0.774               | 0.787             | 0.853        | 0.748        |
| Compound    | 0.622        | 0.63         | 0.701        | 0.673       | <b>0.772</b>    | 0.762             | 0.726           | 0.628            | 0.618              | 0.592            | 0.633             | 0.62                | 0.597             | 0.601        | 0.719        |
| D31         | 0.758        | 0.789        | 0.35         | 0.419       | 0.537           | 0.645             | 0.596           | 0.965            | 0.967              | 0.962            | 0.972             | 0.973               | 0.973             | <b>0.977</b> | 0.877        |
| Aggregation | 0.852        | 0.755        | 0.871        | 0.865       | 0.876           | 0.874             | 0.868           | <b>0.879</b>     | 0.875              | 0.869            | <b>0.879</b>      | 0.875               | 0.869             | 0.848        | 0.876        |
| Glass       | <b>0.433</b> | 0.337        | 0.356        | 0.375       | 0.38            | 0.359             | 0.375           | 0.336            | 0.357              | 0.375            | 0.339             | 0.358               | 0.375             | 0.375        | 0.377        |
| Jain        | <b>0.88</b>  | 0.875        | 0.868        | <b>0.88</b> | 0.863           | 0.866             | 0.868           | 0.851            | 0.863              | 0.868            | 0.851             | 0.863               | 0.868             | 0.863        | 0.587        |
| Pathbased   | 0.721        | <b>0.726</b> | 0.65         | 0.652       | 0.686           | 0.656             | 0.653           | 0.701            | 0.691              | 0.67             | 0.701             | 0.691               | 0.675             | 0.716        | 0.655        |
| Spiral      | 0.352        | 0.345        | <b>0.512</b> | 0.424       | 0.372           | 0.368             | 0.375           | 0.365            | 0.358              | 0.357            | 0.365             | 0.358               | 0.357             | 0.377        | 0.347        |
| R15         | <b>0.997</b> | <b>0.997</b> | 0.59         | 0.582       | 0.762           | 0.787             | 0.732           | 0.992            | 0.992              | 0.992            | 0.993             | 0.993               | <b>0.997</b>      | <b>0.997</b> | <b>0.997</b> |
| Dim1024     | 0.831        | <b>1</b>     | <b>1</b>     | <b>1</b>    | <b>1</b>        | <b>1</b>          | <b>1</b>        | <b>1</b>         | <b>1</b>           | <b>1</b>         | <b>1</b>          | <b>1</b>            | <b>1</b>          | <b>1</b>     | 0.853        |
| A3          | 0.86         | 0.824        | 0.378        | 0.35        | 0.549           | 0.622             | 0.589           | 0.925            | 0.962              | 0.949            | 0.99              | 0.992               | 0.992             | <b>0.998</b> | 0.689        |
| Unba        | 0.867        | 0.749        | 0.502        | 0.5         | 0.714           | 0.865             | 0.806           | 0.942            | 0.949              | <b>0.963</b>     | 0.778             | 0.781               | 0.785             | 0.78         | 0.941        |
| S1          | 0.944        | 0.928        | 0.649        | 0.581       | 0.752           | 0.801             | 0.682           | 0.993            | 0.994              | 0.994            | 0.993             | 0.994               | <b>0.995</b>      | 0.993        | <b>0.995</b> |
| S2          | 0.832        | 0.906        | 0.548        | 0.478       | 0.62            | 0.761             | 0.669           | 0.966            | 0.968              | 0.964            | 0.966             | 0.969               | 0.965             | <b>0.97</b>  | 0.966        |
| S3          | 0.758        | 0.801        | 0.53         | 0.506       | 0.619           | 0.604             | 0.56            | 0.846            | 0.848              | 0.842            | 0.846             | 0.848               | 0.844             | <b>0.858</b> | 0.843        |
| Birch1      | 0.826        | 0.783        | 0.353        | 0.32        | 0.424           | 0.452             | 0.464           | 0.69             | 0.708              | 0.68             | 0.875             | 0.883               | 0.881             | <b>0.912</b> | 0.666        |
| Birch2      | 0.724        | 0.715        | 0.317        | 0.315       | 0.299           | 0.395             | 0.464           | 0.439            | 0.53               | 0.551            | 0.759             | 0.77                | 0.747             | <b>0.832</b> | 0.645        |

Table S 8: The result of Centroid index ( $\Sigma_k = I$ )

| data        | k-means   | fuzzy-c  | GP       | Pareto   | Gk <sub>1</sub> | GPkf <sub>1</sub> | Pf <sub>1</sub> | Gk <sub>10</sub> | GPkf <sub>10</sub> | Pf <sub>10</sub> | Gk <sub>100</sub> | GPkf <sub>100</sub> | Pf <sub>100</sub> | PAM       | Gaussian |
|-------------|-----------|----------|----------|----------|-----------------|-------------------|-----------------|------------------|--------------------|------------------|-------------------|---------------------|-------------------|-----------|----------|
| Flame       | <b>0</b>  | <b>0</b> | 1        | 1        | <b>0</b>        | <b>0</b>          | <b>0</b>        | <b>0</b>         | <b>0</b>           | <b>0</b>         | <b>0</b>          | <b>0</b>            | <b>0</b>          | <b>0</b>  | <b>0</b> |
| Compound    | <b>2</b>  | <b>2</b> | 3        | 3        | 3               | 3                 | <b>2</b>        | <b>2</b>         | <b>2</b>           | <b>2</b>         | <b>2</b>          | <b>2</b>            | <b>2</b>          | <b>2</b>  | <b>2</b> |
| D31         | 7         | 6        | 28       | 29       | 21              | 20                | 23              | 2                | 2                  | 3                | 1                 | 1                   | 1                 | 1         | 4        |
| Aggregation | <b>1</b>  | 2        | <b>1</b> | <b>1</b> | <b>1</b>        | <b>1</b>          | <b>1</b>        | <b>1</b>         | <b>1</b>           | <b>1</b>         | <b>1</b>          | <b>1</b>            | <b>1</b>          | <b>1</b>  | <b>1</b> |
| Glass       | 3         | <b>2</b> | <b>2</b> | 4        | <b>2</b>        | <b>2</b>          | 3               | <b>2</b>         | <b>2</b>           | <b>2</b>         | <b>2</b>          | <b>2</b>            | <b>2</b>          | 3         | <b>2</b> |
| Jain        | <b>0</b>  | <b>0</b> | <b>0</b> | <b>0</b> | <b>0</b>        | <b>0</b>          | <b>0</b>        | <b>0</b>         | <b>0</b>           | <b>0</b>         | <b>0</b>          | <b>0</b>            | <b>0</b>          | <b>0</b>  | <b>0</b> |
| Pathbased   | <b>1</b>  | <b>1</b> | 2        | 2        | <b>1</b>        | <b>1</b>          | <b>1</b>        | <b>1</b>         | <b>1</b>           | <b>1</b>         | <b>1</b>          | <b>1</b>            | <b>1</b>          | <b>1</b>  | <b>1</b> |
| Spiral      | 2         | 2        | 2        | 2        | 2               | 2                 | 2               | 2                | 2                  | 2                | 2                 | 2                   | 1                 | 2         | 1        |
| R15         | <b>0</b>  | <b>0</b> | 14       | 14       | 7               | 7                 | 7               | <b>0</b>         | <b>0</b>           | <b>0</b>         | <b>0</b>          | <b>0</b>            | <b>0</b>          | <b>0</b>  | <b>0</b> |
| Dim1024     | 4         | <b>0</b> | <b>0</b> | <b>0</b> | <b>0</b>        | <b>0</b>          | <b>0</b>        | <b>0</b>         | <b>0</b>           | <b>0</b>         | <b>0</b>          | <b>0</b>            | <b>0</b>          | <b>0</b>  | <b>0</b> |
| A3          | 6         | 7        | 46       | 47       | 38              | 34                | 39              | 7                | 7                  | 10               | <b>0</b>          | 1                   | 1                 | <b>0</b>  | 18       |
| Unba        | <b>2</b>  | 3        | 5        | 5        | 3               | 3                 | 3               | <b>2</b>         | <b>2</b>           | <b>2</b>         | <b>2</b>          | <b>2</b>            | <b>2</b>          | <b>2</b>  | 3        |
| S1          | 1         | 1        | 12       | 12       | 8               | 9                 | 9               | <b>0</b>         | <b>0</b>           | <b>0</b>         | <b>0</b>          | <b>0</b>            | <b>0</b>          | <b>0</b>  | <b>0</b> |
| S2          | 2         | 1        | 11       | 13       | 8               | 8                 | 9               | <b>0</b>         | <b>0</b>           | <b>0</b>         | <b>0</b>          | <b>0</b>            | <b>0</b>          | <b>0</b>  | <b>0</b> |
| S3          | 4         | <b>1</b> | 13       | 13       | 6               | 7                 | 9               | 2                | 2                  | 2                | 2                 | 2                   | 2                 | 2         | 2        |
| Birch1      | <b>16</b> | 18       | 93       | 96       | 81              | 75                | 72              | 38               | 38                 | 39               | 4                 | 4                   | 6                 | 6         | 34       |
| Birch2      | 27        | 27       | 93       | 93       | 91              | 86                | 84              | 51               | 54                 | 56               | 21                | 23                  | 22                | <b>14</b> | 49       |

## D Tuning of parameters $\tau$ and $\beta$

We discuss a sample based selection of tuning parameters  $\beta$  and  $\tau$ , in which the estimator for the vector  $\mu$  of cluster centers depends on  $\beta$  and  $\tau$  as

$$\hat{\mu}_{\tau,\beta} = \underset{\mu}{\operatorname{argmin}} L_{\tau,\beta}(\mu). \quad (\text{S.1})$$

Here we consider  $L_{\tau,\beta}(\mu)$  instead of  $L_{\tau,\beta}(\theta)$  for simplicity. We fix the loss function to assess  $\hat{\mu}_{\tau,\beta}$ , so that the loss function is independent of  $\beta$  and  $\tau$ . For example, we adopt the loss function of fuzzy c-means as

$$L_0(\mu) = \sum_{i=1}^n \left( \frac{1}{K} \sum_{k=1}^K \|x_i - \mu_k\|^{\frac{2}{1-m_0}} \right)^{1-m_0}, \quad (\text{S.2})$$

where  $m_0$  is a fixed constant. Henceforth, we call  $L_0(\mu)$  the anchor loss function. There arises a serious problem due to overlearning if we naively take the argument to minimize  $L_0(\hat{\mu}_{\tau,\beta})$  in  $(\beta, \tau)$  for the selection. In fact, we employ the same data set to evaluate  $L_0(\mu)$  and  $\hat{\mu}_{\tau,\beta}$ , in which the anchor loss function  $L_0(\mu)$  plugged-in  $\mu = \hat{\mu}_{\tau,\beta}$  is written by

$$L_0(\hat{\mu}_{\tau,\beta}) = \sum_{i=1}^n \left( \frac{1}{K} \sum_{k=1}^K \|x_i - \hat{\mu}_{\tau,\beta k}\|^{\frac{2}{1-m_0}} \right)^{1-m_0}, \quad (\text{S.3})$$

which gives bias from the dependence between  $x_i$  and  $\hat{\mu}_{\tau,\beta}$ . If  $\{x_i\}$  in (S.3) are independent of the data set used in (S.1), a biased aspect would not occur. We build on a method based on the leave-one-out cross validation with a low computational cost. For simplicity in the subsequent discussion we write

$$L_0(\mu) = \sum_{i=1}^n \ell_0(x_i, \mu) \quad (\text{S.4})$$

and

$$L_{\tau,\beta}(\mu) = \sum_{i=1}^n \ell_{\tau,\beta}(x_i, \mu), \quad (\text{S.5})$$

where

$$\ell_0(x, \mu) = \left( \frac{1}{K} \sum_{k=1}^K \|x - \mu_k\|^{\frac{2}{1-m_0}} \right)^{1-m_0} \quad (\text{S.6})$$

$$\ell_{\tau,\beta}(x, \mu) = \frac{1}{\tau\beta} \left[ \left\{ \frac{1}{K} \sum_{k=1}^K (1 + \tau\beta \|x - \mu_k\|^2)^{-\frac{1}{\beta}} \right\}^{-\beta} - 1 \right]. \quad (\text{S.7})$$

Then the leave-one-out statistic is given by

$$\text{LOO}(\beta, \tau) = \sum_{i=1}^n \ell_0(x_i, \mu_{\tau,\beta}^{(-i)}), \quad (\text{S.8})$$

where

$$\mu_{\tau,\beta}^{(-i)} = \underset{\mu}{\operatorname{argmin}} \sum_{j \neq i}^n \ell_{\tau,\beta}(x_j, \mu). \quad (\text{S.9})$$

Thus,  $\text{LOO}(\beta, \tau)$  prevents from overlearning because  $x_i$  and  $\mu_{\tau, \beta}^{(-i)}$  are statistically independent. However it incurs a high cost to compute the validated estimates  $\mu_{\tau, \beta}^{(-i)}$  as follows. Here, we consider an approximated analogue for  $\text{LOO}(\beta, \tau)$ . By the definition of  $\mu_{\tau, \beta}^{(-i)}$ ,

$$\sum_{j \neq i} \frac{\partial}{\partial \mu} \ell_{\tau, \beta}(x_j, \mu_{\tau, \beta}^{(-i)}) = 0, \quad (\text{S.10})$$

which means

$$\sum_{j=1}^n \frac{\partial}{\partial \mu} \ell_{\tau, \beta}(x_j, \mu_{\tau, \beta}^{(-i)}) = \frac{\partial}{\partial \mu} \ell_{\tau, \beta}(x_i, \mu_{\tau, \beta}^{(-i)}), \quad (\text{S.11})$$

and is approximately given by

$$\sum_{j=1}^n \frac{\partial^2}{\partial \mu \partial \mu^\top} \ell_{\tau, \beta}(x_j, \hat{\mu}_{\tau, \beta})(\hat{\mu}_{\tau, \beta} - \mu_{\tau, \beta}^{(-i)}) = \frac{\partial}{\partial \mu} \ell_{\tau, \beta}(x_i, \mu_{\tau, \beta}^{(-i)}) + o_{\mathbf{P}}(1). \quad (\text{S.12})$$

Therefore we conclude that

$$\hat{\mu}_{\tau, \beta} - \mu_{\tau, \beta}^{(-i)} = h_{\beta, \tau}(x_i) + o_{\mathbf{P}}(n^{-1}). \quad (\text{S.13})$$

where

$$h_{\beta, \tau}(x_i) = \left\{ \sum_{j=1}^n \frac{\partial^2}{\partial \mu \partial \mu^\top} \ell_{\tau, \beta}(x_j, \hat{\mu}_{\tau, \beta}) \right\}^{-1} \frac{\partial}{\partial \mu} \ell_{\tau, \beta}(x_i, \hat{\mu}_{\tau, \beta}). \quad (\text{S.14})$$

In accordance with this, we have an approximation for  $\text{LOO}(\beta, \tau)$  by

$$\widetilde{\text{LOO}}(\beta, \tau) = \sum_{i=1}^n \ell_0(x_i, \hat{\mu}_{\tau, \beta} - h_{\beta, \tau}(x_i)) \quad (\text{S.15})$$

and the expanded version

$$\widetilde{\text{LOO}}_1(\beta, \tau) = L_0(\hat{\mu}_{\tau, \beta}) - \sum_{i=1}^n \frac{\partial}{\partial \mu^\top} \ell_0(x_i, \hat{\mu}_{\tau, \beta}) h_{\beta, \tau}(x_i). \quad (\text{S.16})$$

Hence, we propose a selection method by

$$(\hat{\beta}, \hat{\tau}) = \underset{\tau, \beta}{\operatorname{argmin}} \widetilde{\text{LOO}}(\beta, \tau). \quad (\text{S.17})$$

$$\ell_{\tau, \beta}(x, \mu) = \frac{1}{\tau \beta} \left[ \left\{ \frac{1}{K} \sum_{k=1}^K (1 + \tau \beta \|x - \mu_k\|^2)^{-\frac{1}{\beta}} \right\}^{-\beta} - 1 \right] \quad (\text{S.18})$$

$$= \frac{1}{\tau \beta} \left[ \left\{ \frac{1}{K} \sum_{k=1}^K w(x, \mu_k) \right\}^{-\beta} - 1 \right] \quad (\text{S.19})$$

$$= \frac{1}{\tau \beta} (\bar{w}(x, \mu)^{-\beta} - 1), \quad (\text{S.20})$$



where

$$w(x, \mu_k) = (1 + \tau\beta\|x - \mu_k\|^2)^{-\frac{1}{\beta}} \quad (\text{S.21})$$

$$\bar{w}(x, \mu) = \frac{1}{K} \sum_{k=1}^K w(x, \mu_k). \quad (\text{S.22})$$

Here we have

$$\frac{\partial}{\partial \mu_k} \ell_{\tau, \beta}(x, \mu) = \frac{1}{\tau\beta} (-\beta) \bar{w}(x, \mu)^{-\beta-1} \frac{1}{K} \frac{\partial}{\partial \mu_k} w(x, \mu_k) \quad (\text{S.23})$$

$$= -\frac{1}{\tau K} \bar{w}(x, \mu)^{-\beta-1} \left(-\frac{1}{\beta}\right) (1 + \tau\beta\|x - \mu_k\|^2)^{-\frac{1+\beta}{\beta}} 2\tau\beta(x - \mu_k)(-1) \quad (\text{S.24})$$

$$= -\frac{2}{K} \bar{w}(x, \mu)^{-\beta-1} w(x, \mu_k)^{1+\beta} (x - \mu_k) \quad (\text{S.25})$$

$$= -\frac{2}{K} \left( \frac{w(x, \mu_k)}{\frac{1}{K} \sum_{i=1}^K w(x, \mu_k)} \right)^{1+\beta} (x - \mu_k) \quad (\text{S.26})$$

$$= -2K^\beta \left( \frac{w(x, \mu_k)}{\sum_{i=1}^K w(x, \mu_k)} \right)^{1+\beta} (x - \mu_k) \quad (\text{S.27})$$

For  $k \neq m$  we have

$$\frac{\partial}{\partial \mu_k \partial \mu_m^\top} \ell_{\tau, \beta}(x, \mu) \quad (\text{S.28})$$

$$= -\frac{2}{K} w(x, \mu_k)^{1+\beta} (x - \mu_k) \frac{\partial}{\partial \mu_m^\top} \bar{w}(x, \mu)^{-\beta-1} + \frac{2}{K} \bar{w}(x, \mu)^{-\beta-1} \frac{\partial}{\partial \mu_m^\top} \{w(x, \mu_k)^{1+\beta} (x - \mu_k)\} \quad (\text{S.29})$$

$$= -\frac{2}{K} w(x, \mu_k)^{1+\beta} (x - \mu_k) \frac{\partial}{\partial \mu_m^\top} \bar{w}(x, \mu)^{-\beta-1} \quad (\text{S.30})$$

$$= -\frac{2}{K} w(x, \mu_k)^{1+\beta} (x - \mu_k) (-\beta - 1) \bar{w}(x, \mu)^{-\beta-2} \frac{1}{K} \frac{\partial}{\partial \mu_m^\top} w(x, \mu_m) \quad (\text{S.31})$$

$$= \frac{2(1 + \beta)}{K^2} w(x, \mu_k)^{1+\beta} \bar{w}(x, \mu)^{-\beta-2} (x - \mu_k) \left(-\frac{1}{\beta}\right) (1 + \tau\beta\|x - \mu_m\|^2)^{-\frac{1+\beta}{\beta}} 2\tau\beta(x - \mu_m)^\top (-1) \quad (\text{S.32})$$

$$= \frac{4\tau(1 + \beta)}{K^2} \bar{w}(x, \mu)^{-\beta-2} w(x, \mu_k)^{1+\beta} w(x, \mu_m)^{1+\beta} (x - \mu_k)(x - \mu_m)^\top \quad (\text{S.33})$$

And we have

$$\frac{\partial}{\partial \mu_k^\top} \{w(x, \mu_k)^{1+\beta} (x - \mu_k)\} \quad (\text{S.34})$$

$$= (x - \mu_k) \left(-\frac{1 + \beta}{\beta}\right) (1 + \tau\beta\|x - \mu_k\|^2)^{-\frac{1+2\beta}{\beta}} 2\tau\beta(x - \mu_k)^\top (-1) + w(x, \mu_k)^{1+\beta} I(-1) \quad (\text{S.35})$$

$$= 2\tau(1 + \beta) w(x, \mu_k)^{1+2\beta} (x - \mu_k)(x - \mu_k)^\top - w(x, \mu_k)^{1+\beta} I \quad (\text{S.36})$$

Hence for  $k = m$ , we have

$$\frac{\partial}{\partial \mu_k \partial \mu_k^\top} \ell_{\tau, \beta}(x, \mu) = \frac{4\tau(1+\beta)}{K^2} \bar{w}(x, \mu)^{-\beta-2} w(x, \mu_k)^{2(1+\beta)} (x - \mu_k)(x - \mu_k)^\top \quad (\text{S.37})$$

$$+ \frac{2}{K} \bar{w}(x, \mu)^{-\beta-1} \left\{ 2\tau(1+\beta) w(x, \mu_k)^{1+2\beta} (x - \mu_k)(x - \mu_k)^\top - w(x, \mu_k)^{1+\beta} I \right\} \quad (\text{S.38})$$

Hence we have

$$\frac{\partial}{\partial \mu_k \partial \mu_m^\top} \ell_{\tau, \beta}(x, \mu) \quad (\text{S.39})$$

$$= \frac{4\tau(1+\beta)}{K^2} \bar{w}(x, \mu)^{-\beta-2} w(x, \mu_k)^{1+\beta} \left\{ w(x, \mu_m)^{1+\beta} + \delta_{km} K \bar{w}(x, \mu) w(x, \mu_m)^\beta \right\} (x - \mu_k)(x - \mu_m)^\top \quad (\text{S.40})$$

$$- \frac{2}{K} \delta_{km} \bar{w}(x, \mu)^{-\beta-1} w(x, \mu_k)^{1+\beta} I \quad (\text{S.41})$$

## E R code of the Pareto clustering

Arguments

- **x**: data matrix of  $n \times d$
- **tau, beta**: parameters of Pareto clustering  $\tau$  and  $\beta$
- **iter**: iteration step  $T$
- **centers**: locations of cluster centers of  $K \times d$
- **Sigma**: a list of variance components  $\Sigma_k$
- **pi**: a vector of mixing proportions  $\pi_1, \dots, \pi_K$

R code

---

```
function(x, tau, beta, iter=100, centers, Sigma, pi) {
  epsilon= .Machine$double.xmin*1000
  Max= .Machine$double.xmax/1000
  n=dim(x)[1]
  d=dim(x)[2]
  det_k=1
  if(2-d*beta<=0)
    beta=1.99/d
  K=dim(centers)[1]
```

```

for(i in 1:iter){
  centers.old=centers
  q_numerator=NULL
  s_numerator=NULL
  for(k in 1:K){
    z=t(t(x)-centers[k,])
    Sigma[[k]]=0.95*Sigma[[k]]+0.05*diag(max(diag(Sigma[[k]]),epsilon),d)
    det_k=abs(det(Sigma[[k]]))
    w=det_k^(-1/2)*(1+beta*tau*diag(z%*%ginv(Sigma[[k]])%*%t(z)))^(-1/beta)
    q_numerator=cbind(q_numerator,pi[k]*w)
  }
  q_numerator[q_numerator==Inf]=Max
  q_numerator[q_numerator==0]=epsilon
  q=q_numerator/apply(q_numerator,1,sum)
  q[q==Inf]=Max
  q[q==0]=epsilon
  pi_numerator=numeric(0)
  for(k in 1:K){
    centers[k,]=apply(q[,k]^(1+beta)*x,2,sum)/sum(q[,k]^(1+beta))
    z=t(t(x)-centers[k,])
    Sigma[[k]]=tau*(2-p*beta)*t(q[,k]^(1+beta)*z)%*%z/sum(q[,k]^(1+beta))
    Sigma[[k]]=0.95*Sigma[[k]]+0.05*diag(max(diag(Sigma[[k]]),epsilon),d)
    det_k=abs(det(Sigma[[k]]))
    B=det_k^(beta/2)*(1+beta*tau*diag(z%*%ginv(Sigma[[k]])%*%t(z)))
    pi_numerator[k]= (sum(q[,k]^(1+beta)*B))^(-1/(1+beta))
  }
  pi_numerator[pi_numerator==Inf]=Max
  pi_numerator[pi_numerator==0]=epsilon
  pi=pi_numerator/(sum(pi_numerator))
  Sa=mean((centers-centers.old)^2)
  if(Sa<10^(-10))
    break
}
return(list(centers=centers,Sigma=Sigma,pi=pi))
}

```

---
